# Supplementary material for: Targeted exosome coating gene-chem nanocomplex as “nanoscavenger” for clearing α-synuclein and immune activation of Parkinson’s disease
Source: PubMed Central journal article supplement — Sci Adv. 2020 Dec 11;6(50):eaba3967. doi: 10.1126/sciadv.aba3967 (PMC7732192; doi:10.1126/sciadv.aba3967), 2020-12-11
Supplement: aba3967_SM.pdf [file aba3967_SM.pdf]

## Supplementary Materials for

### **Targeted exosome coating gene-chem nanocomplex as “nanoscavenger” for clearing $\alpha$ -synuclein and immune activation of Parkinson’s disease**

Linying Liu, Yan Li, Huan Peng, Ruiyuan Liu, Weihong Ji, Zhuyan Shi, Jie Shen, Guanghui Ma, Xin Zhang\*

\*Corresponding author. Email: [xzhang@ipe.ac.cn](mailto:xzhang@ipe.ac.cn)

Published 11 December 2020, *Sci. Adv.* **6**, eaba3967 (2020)  
DOI: 10.1126/sciadv.aba3967

#### **This PDF file includes:**

Figs. S1 to S8  
Table S1

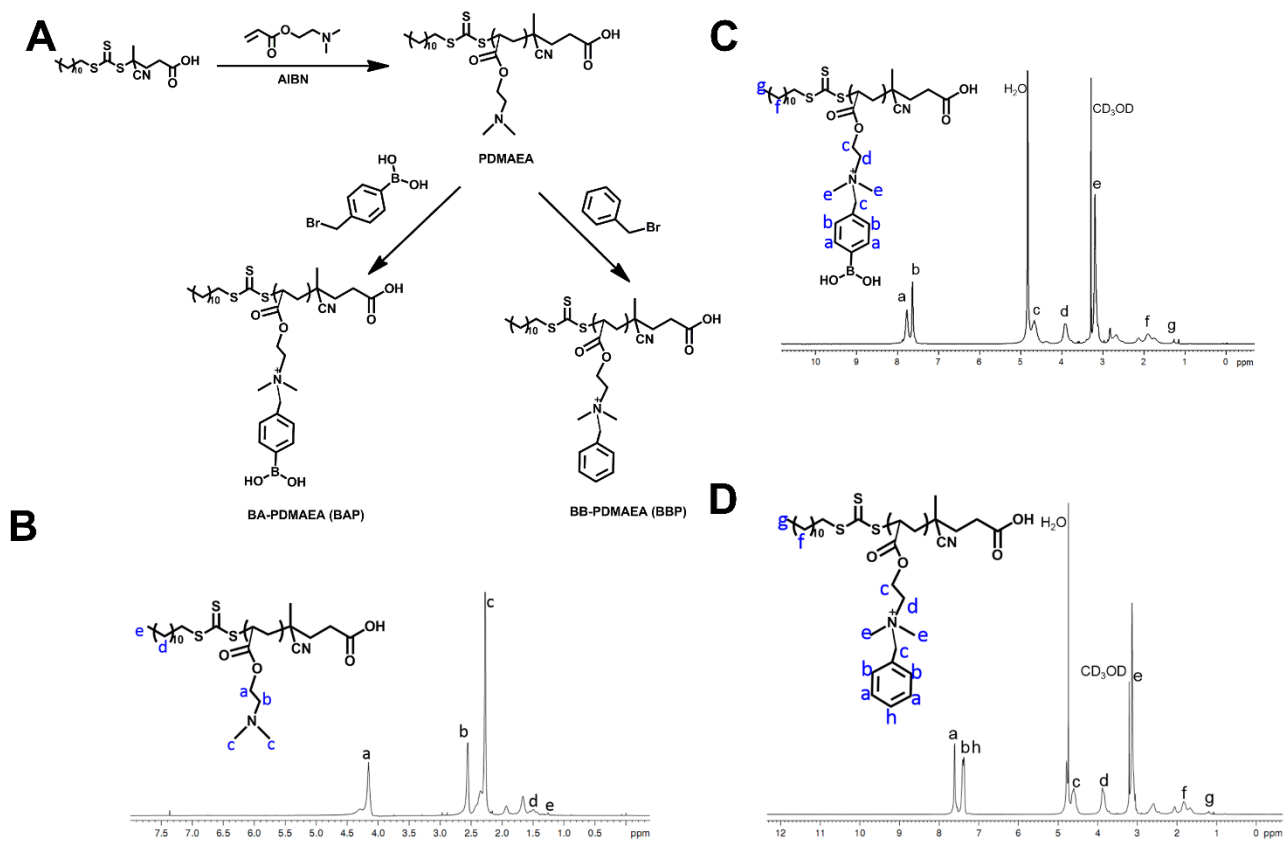

**fig. S1. The synthetic routes and characterization of BAP and BBP polymers.** (A) The synthetic routes of BAP and BBP polymers. (B)  $^1\text{H}$  NMR spectra of PDMAEA. (C)  $^1\text{H}$  NMR spectra of BAP. (D)  $^1\text{H}$  NMR spectra of BBP.

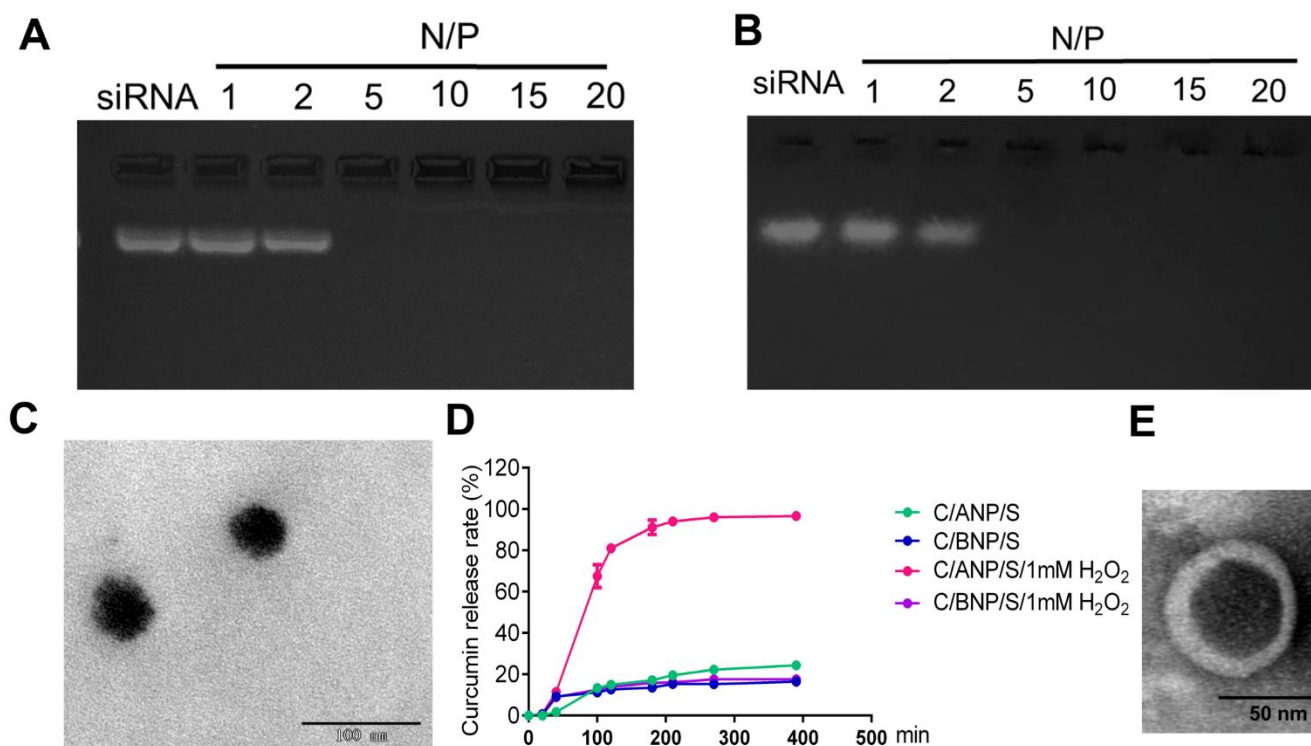

**fig. S2. Characterizations of C/ANP/S and exosome.** (A) Gel retardation assay of siSNCA at various N/P ratios for C/ANP. (B) Gel retardation assay of siSNCA at various N/P ratios for C/BNP. (C) TEM image of C/ANP/S. (D) Curcumin release rate of NPs. (E) TEM image of exosome.

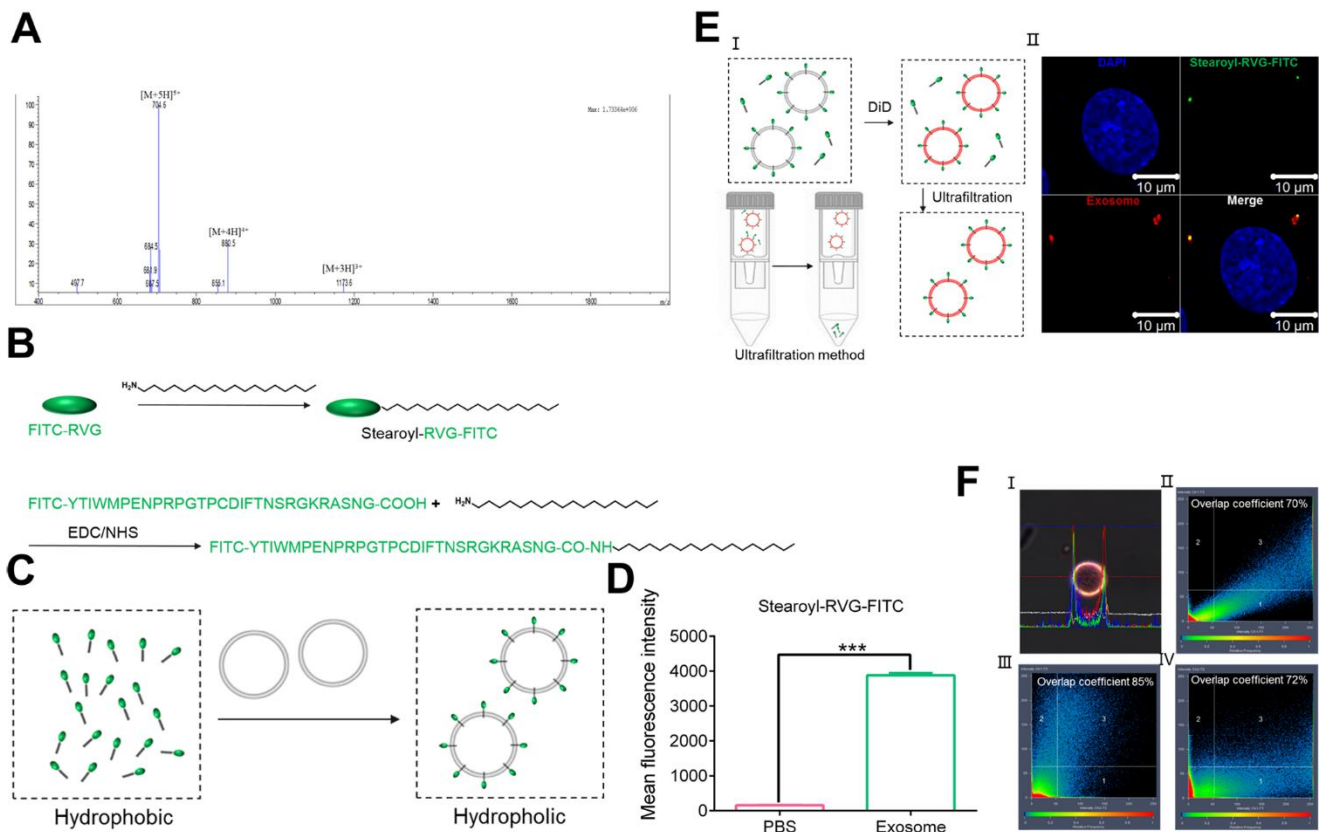

**fig. S3. REXO and REXO-C/ANP/S preparation.** (A) Mass spectrum of stearoyl-RVG (M.W.=3518.19). Stearoyl-RVG-FITC synthesis. (B) Scheme of stearyl-RVG-FITC synthesis. (I) Reaction formula of stearyl-RVG-FITC synthesis. (II) Reaction formula of stearyl-RVG-FITC synthesis. (C) Scheme of stearyl-RVG-FITC modified exosome preparation. (D) Fluorescence intensity of stearyl-RVG-FITC in exosome and equal volume PBS after ultrasound method. (E) Stearoyl-RVG-FITC modified exosome characterization. (I) The preparation scheme of DiI labelled exosome with stearyl-RVG-FITC modification. (II) Confocal images of stearyl-RVG-FITC modified exosome. (F) Channel analysis of REXO-C/ANP/S confocal images. (I) The confocal image of REXO-C/ANP/S. (II) Overlap analysis of exosome-DiI and curcumin. (III) Overlap analysis of Cy5-siRNA and curcumin. (IV) Overlap analysis of exosome-DiI and Cy5-siRNA. (Ch1-T1: exosome-DiI, Ch2-T2: Cy5-siRNA, Ch1-T3: curcumin, T PMT-T1: Bright field).

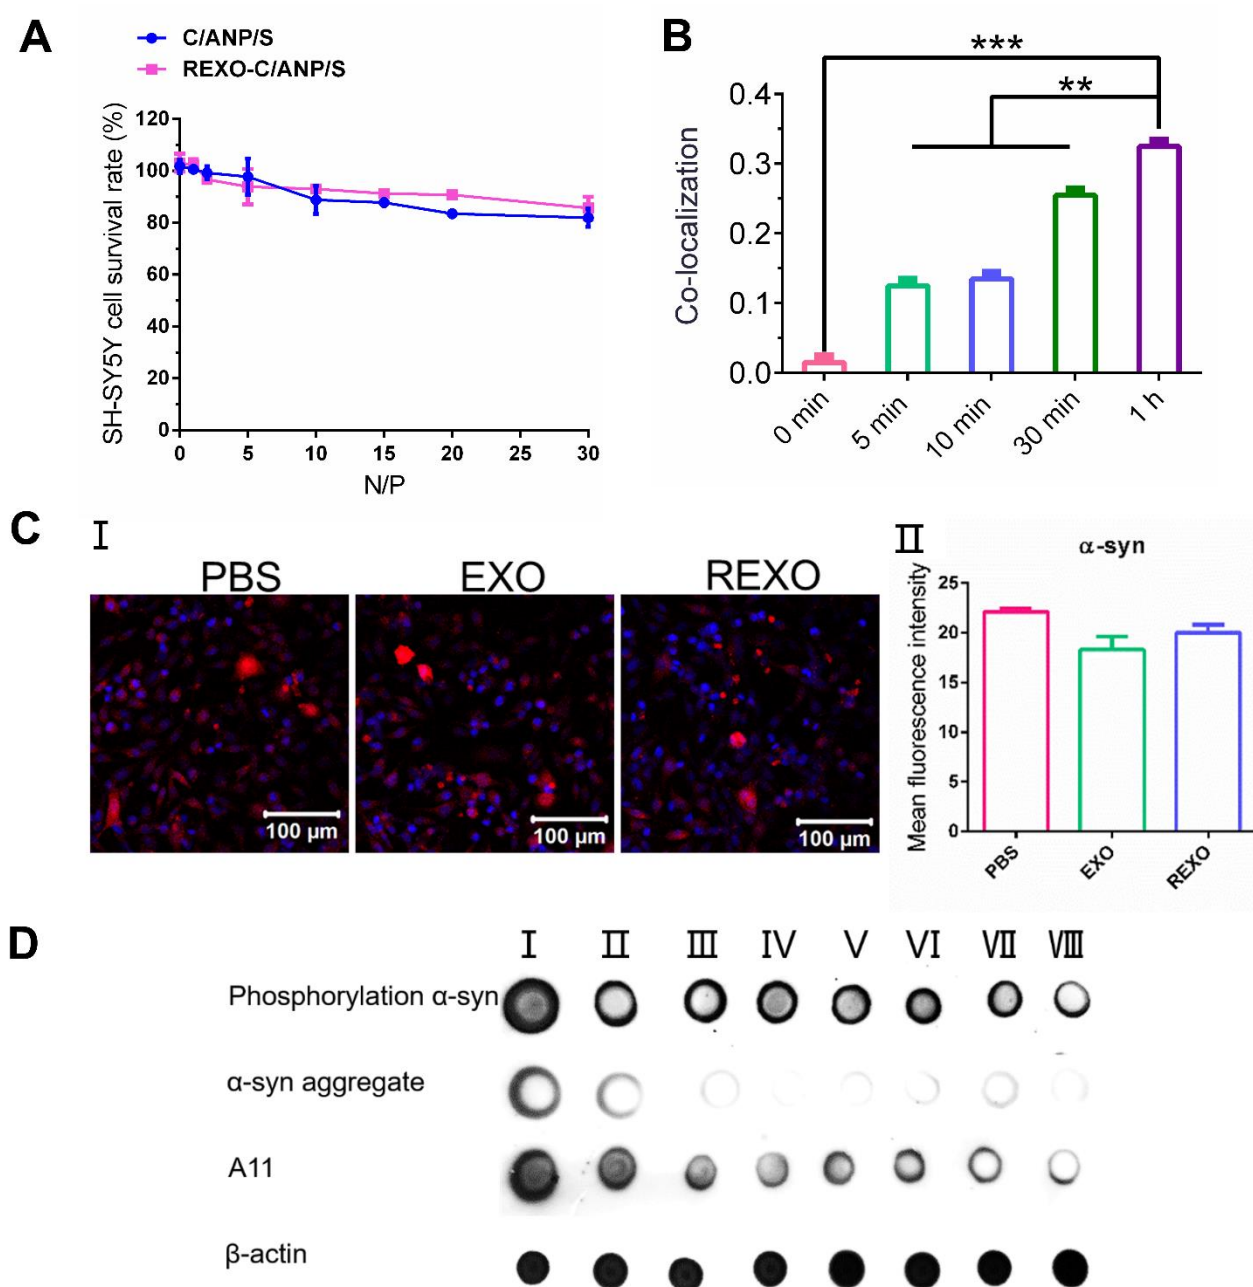

**fig. S4. REXO-C/ANP/S treatment *in vitro*.** (A) MTT assay of C/ANP/S and REXO-C/ANP/S from N/P ratio of 1 to 30. (B) Co-localization quantitation of SH-SY5Y cells CLSM after NPs incubation in 0 min, 5 min, 10 min, 30 min and 1 h. Cell membrane was labelled with CellMask™ deep red membrane stain and exosome was labelled with DiI. (C)  $\alpha$ -Syn-mCherry in cells treated with exosomes. (I) Assessment by CLSM of  $\alpha$ -syn-mCherry-SH-SY5Y cells after incubation with exosomes in transwell for 72 h. (II) Quantitative analysis of the  $\alpha$ -syn-mCherry. ( $\alpha$ -syn-mCherry: red and DAPI: blue). (D) Dot blot of protein in cells incubated with different NPs. (I: PBS; II: Nude C+S; III: C/BNP/S; IV: C/ANP/S; V:

EXO-C/ANP/S; VI: REXO-C/ANP/siNonsense; VII: REXO-ANP/S; VIII: REXO-C/ANP/S). \* $P < 0.05$ , \*\* $P < 0.01$ , \*\*\* $P < 0.001$ .

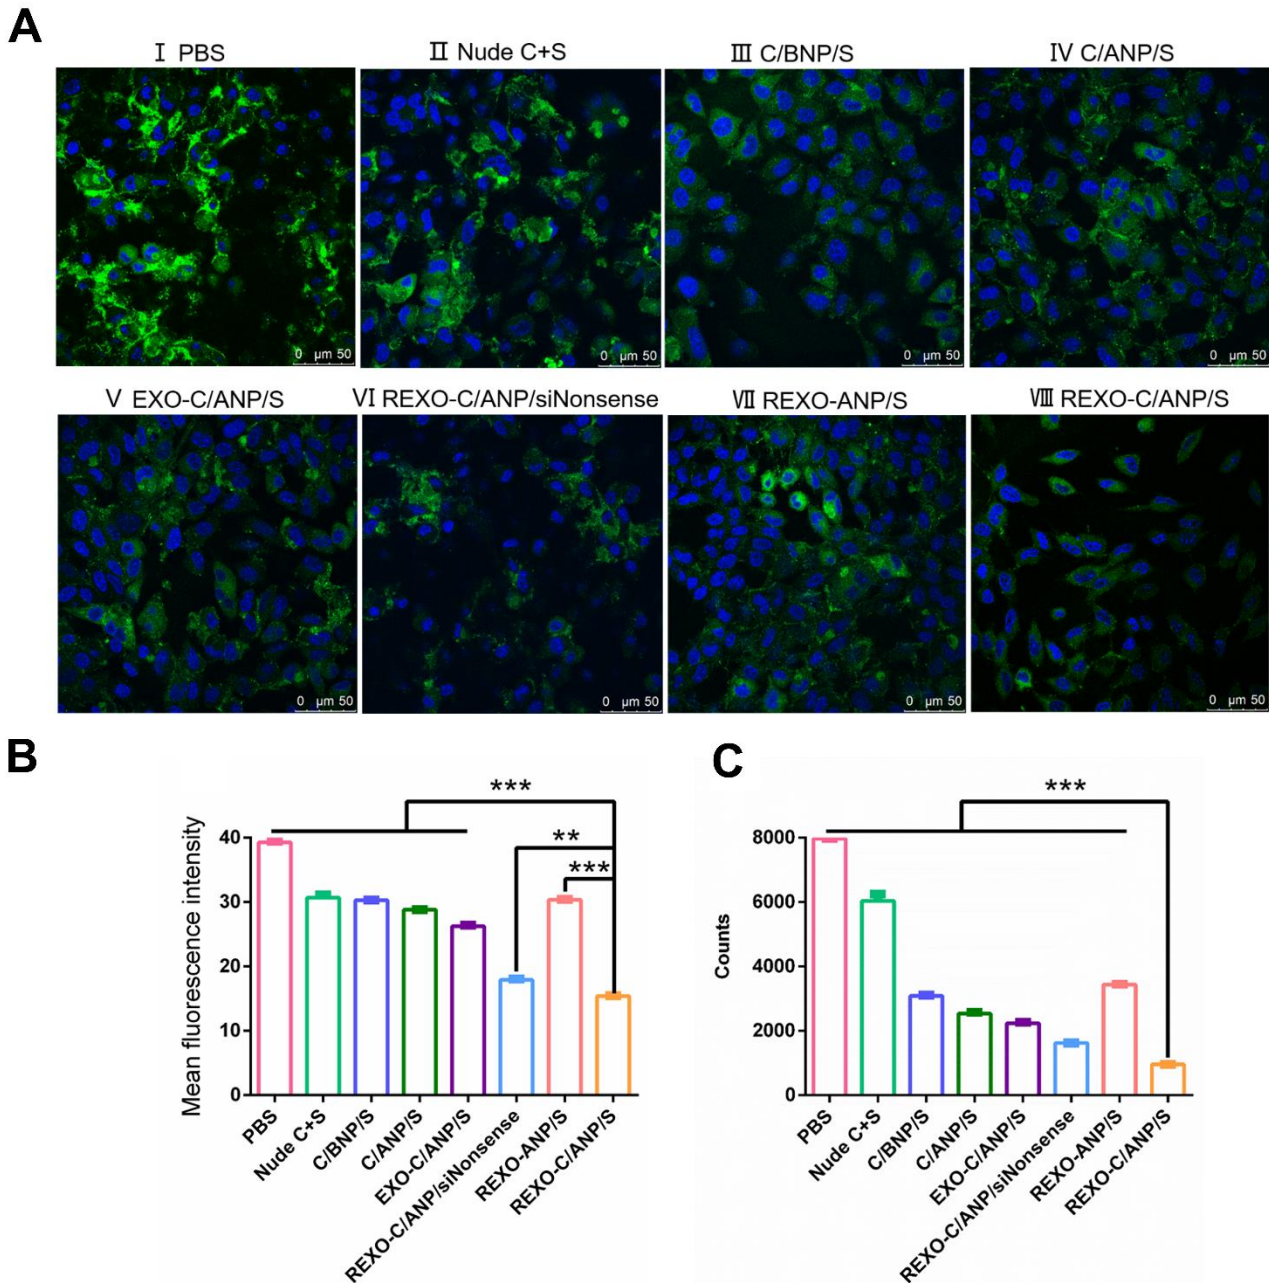

**fig. S5. ROS in cells incubated with different NPs in 72 h.** (A) ROS images of cells. (B) Mean fluorescence intensity of green color in CLSM images quantitated by Image J. (C) Green area counts in CLSM images quantitated by Image J. (I: PBS; II: Nude C+S; III: C/BNP/S; IV: C/ANP/S; V: EXO-C/ANP/S; VI: REXO-C/ANP/siNonsense; VII: REXO-ANP/S; VIII: REXO-C/ANP/S) \* $P < 0.05$ , \*\* $P < 0.01$ , \*\*\* $P < 0.001$ .

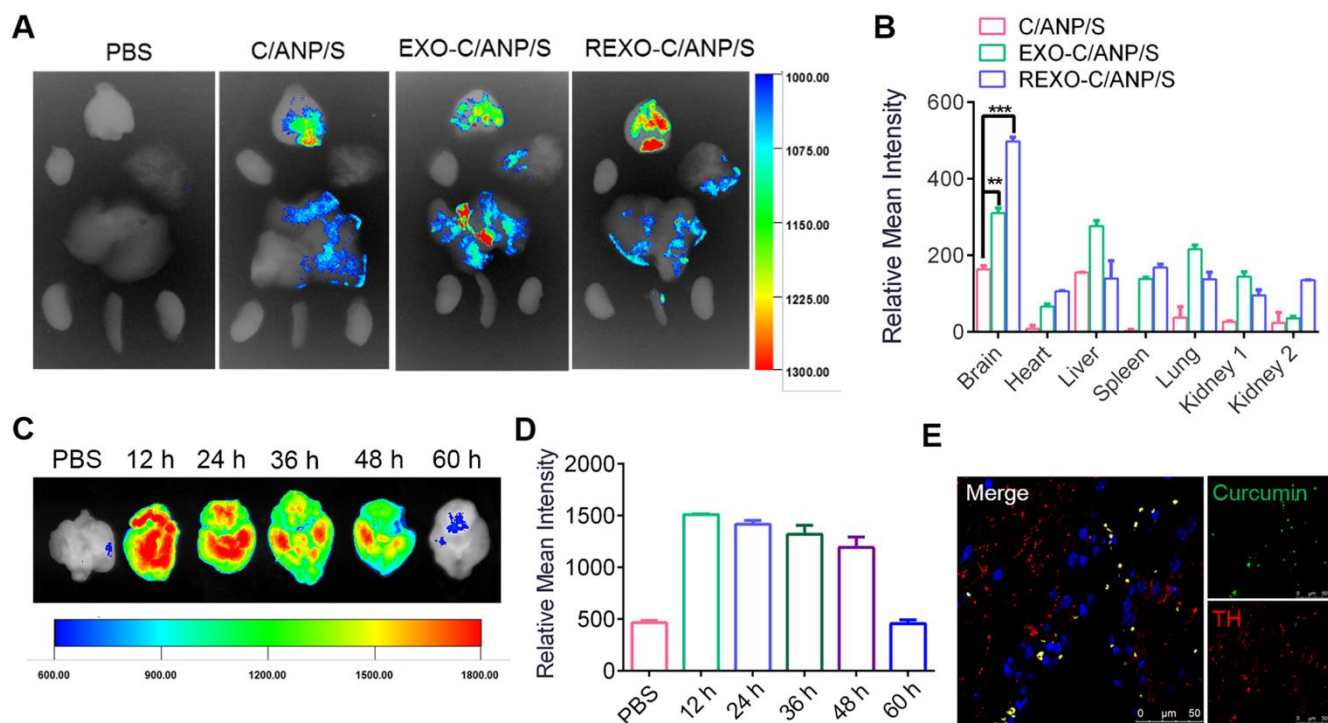

**fig. S6. Ex-vivo bioluminescence imaging.** (A) Ex-vivo bioluminescence images of C/ANP/S, EXO-C/ANP/S and REXO-C/ANP/S (1 mg/kg curcumin) treated PD mice after 24 h *via* intravenous injection. (B) Quantitation of ex-vivo bioluminescence images in (A). (The relative mean fluorescence intensity was compared with the control organs. Relative mean fluorescence intensity of NP treated mice brain=mean fluorescence intensity of NP treated mice brain - mean fluorescence intensity of 5% glucose solution treated mice brain.). (C) Ex-vivo bioluminescence images of brain from REXO-C/ANP/S (2 mg/kg curcumin) treated PD mice at designed time points after intravenous injection. (D) Quantitation of ex-vivo bioluminescence images in (C). (E) Immunofluorescence staining of brain substantia nigra region from REXO-C/ANP/S (2 mg/kg curcumin) treated PD mice after 12 h *via* intravenous injection. Nuclei: DAPI, blue; dopaminergic neurons: TH, red; curcumin: green. \* $P < 0.05$ , \*\* $P < 0.01$ , \*\*\* $P < 0.001$ .

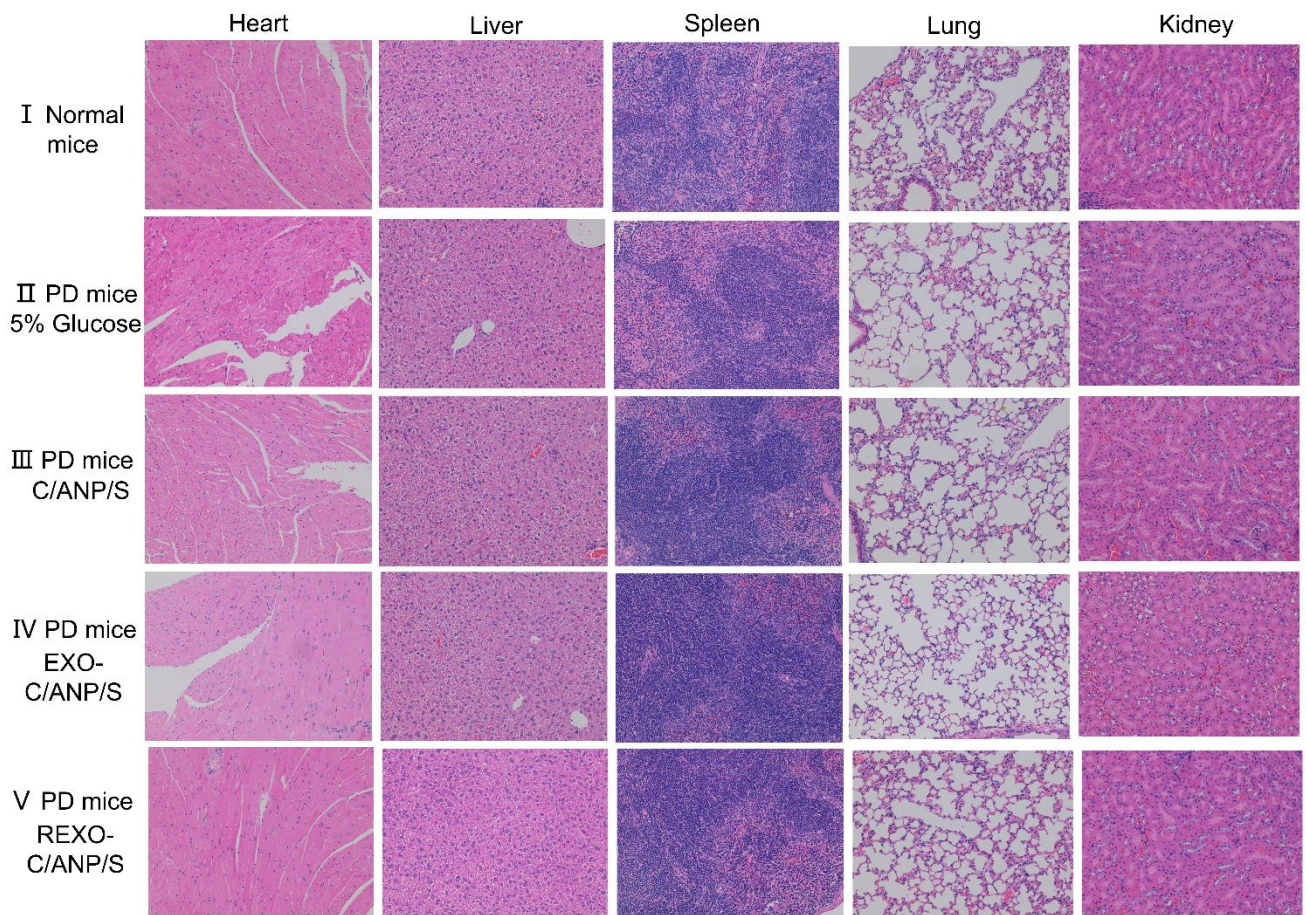

**fig. S7. Hematoxylin-eosin (HE) staining of treated mice organs' slices.**



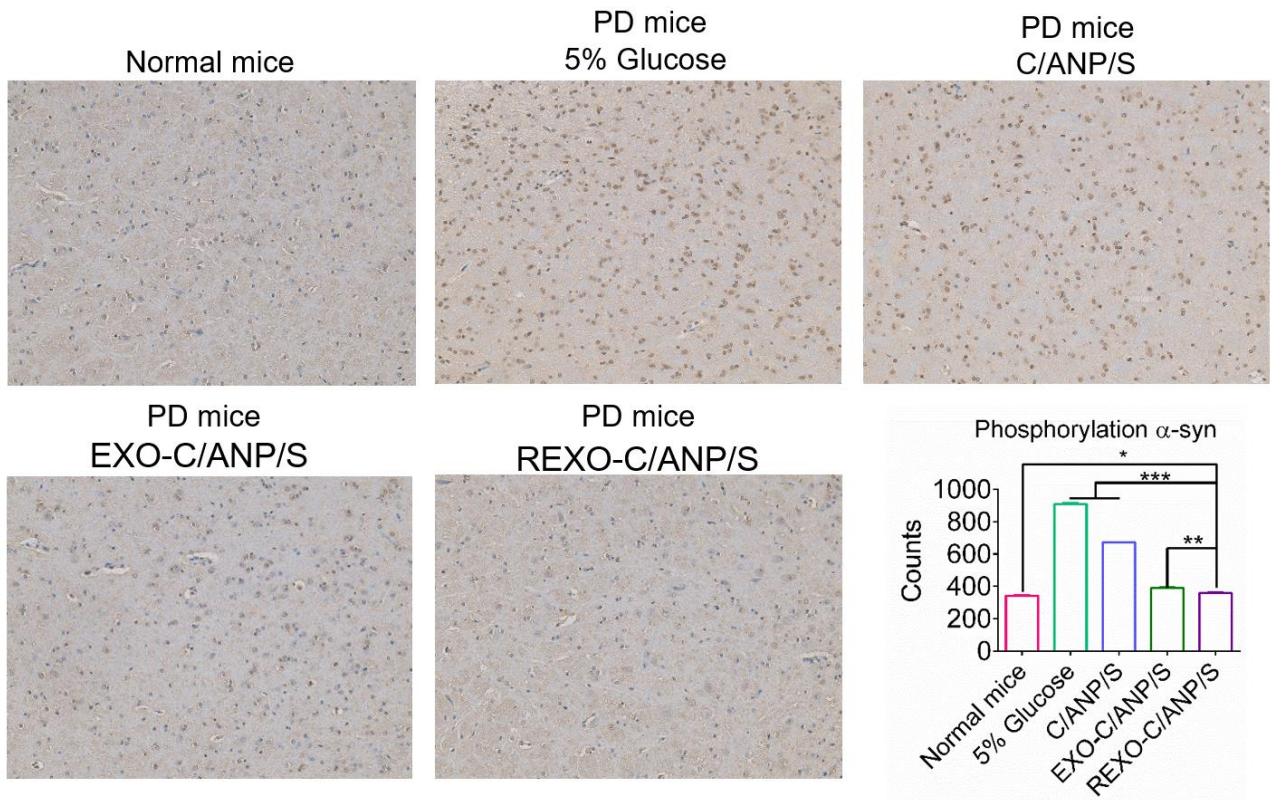

**fig. S8. Phosphorylation  $\alpha$ -syn immunohistochemistry staining (anti-Phosphorylation  $\alpha$ -syn antibody) of brain slides in treated mice SN region. \* $P < 0.05$ , \*\* $P < 0.01$ , \*\*\* $P < 0.001$ .**

**Table S1. Sequence information**

| Name              | Sequence                                            |
|-------------------|-----------------------------------------------------|
| RVG29             | NH <sub>2</sub> -YTIWMPENPRPGTPCDIFTNSRGKRASNG-COOH |
| Stearoyl-RVG      | NH <sub>2</sub> -YTIWMPENPRPGTPCDIFTNSRGKRASNG-C18  |
| Stearoyl-RVG-FITC | FITC-YTIWMPENPRPGTPCDIFTNSRGKRASNG-C18              |
| siSNCA            | Antisense strand, 5'-UGCUCUCCAACAUUUGUCTT-3'        |
